# Supplementary material for: Effect of Operational Parameters on the Removal of Carbamazepine and Nutrients in a Submerged Ceramic Membrane Bioreactor
Source: MDPI journal article supplement (doi:10.3390/membranes12040420), 2022-04-14
Supplement: s1 [file s1]

## Article

# Effect of Operational Parameters on the Removal of Carbamazepine and Nutrients in a Submerged Ceramic Membrane Bioreactor

hanh-Chau Dao <sup>1,2</sup>, Chih-Chi Yang <sup>1</sup>, Ku-Fan Chen <sup>1</sup> and Yung-Pin Tsai <sup>1,\*</sup>

<sup>1</sup> Department of Civil Engineering, National Chi Nan University, Nantou Hsien 54561, Taiwan; daokhanhchau07@gmail.com (K.C.D.); chi813@gmail.com (C.C.Y.); kfchen@ncnu.edu.tw (K.F.C.)

<sup>2</sup> Dong Nai Technology University, Bien Hoa, Dong Nai 810000, Vietnam

\* Correspondence: yptsai@ncnu.edu.tw; Tel.: +886-49-2910960 (ext. 4121)

**Citation:** Dao, K.C.; Yang, C.-C.; Chen, K.-F.; Tsai, Y.-P. Effect of Operational Parameters on the Removal of Carbamazepine and Nutrients in a Submerged Ceramic Membrane Bioreactor. *Membranes* **2022**, *12*, 420. <https://doi.org/10.3390/membranes12040420>

Academic Editors: Michael O. Daramola, Ahmad Fauzi Ismail

Received: 14 March 2022

Accepted: 7 April 2022

Published: 14 April 2022

**Publisher's Note:** MDPI stays neutral with regard to jurisdictional claims in published maps and institutional affiliations.

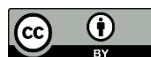

**Copyright:** © 2022 by the authors. Submitted for possible open access publication under the terms and conditions of the Creative Commons Attribution (CC BY) license (<https://creativecommons.org/licenses/by/4.0/>).

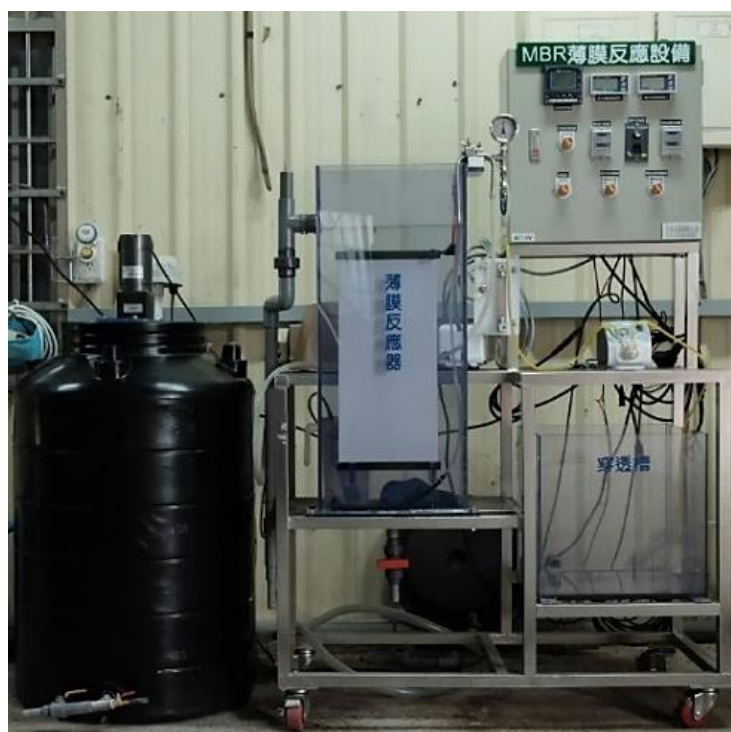

**Figure S1.** MBR experimental setup in practice.

**Table S1.** Physico-chemical and pharmacological properties of CBZ.

| Chemical structure                   | 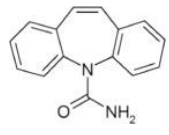 |
|--------------------------------------|---------------------------------------------------------------------------------------|
| Molecular formula                    | C <sub>15</sub> H <sub>12</sub> N <sub>2</sub> O                                      |
| Molecular weight                     | 236.27 g/mol                                                                          |
| Drug Classes                         | Anticonvulsants                                                                       |
| Water solubility                     | 18 mg/L at 25 °C                                                                      |
| Log Kow (octanol-water partitioning) | 2.45                                                                                  |
| Henry's law constant                 | 1.09 × 10 <sup>-5</sup> Pa m <sup>3</sup> /mol (25 °C)                                |
| pKa                                  | 13.9                                                                                  |
| Melting point                        | 189–193 °C                                                                            |

|                                          |                                                                              |
|------------------------------------------|------------------------------------------------------------------------------|
| Biological Half-Life                     | 35 to 40 hours after one dose of carbamazepine extended-release formulations |
| Elimination of half-life (environmental) | 328 d                                                                        |
| Appearance                               | White, light yellowish powder                                                |

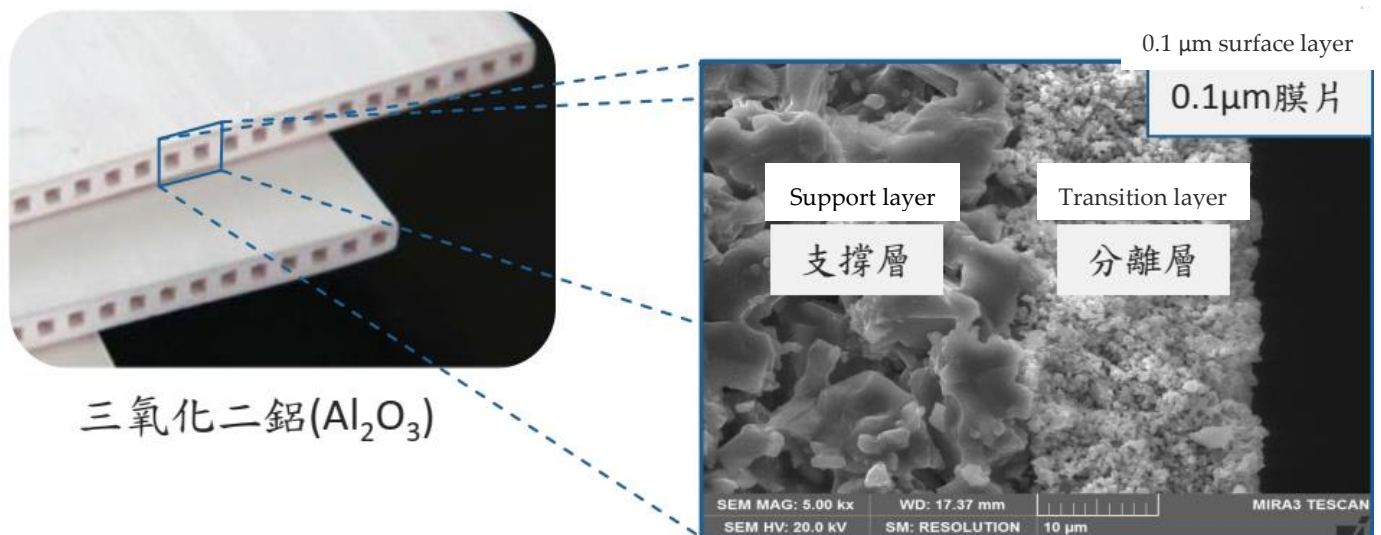

Figure S2. SEM photo of section part of flat-sheet ceramic membrane

Table S2. Experimental values of trans-membrane pressure (TMP).

| Std | Run | Factor 1     | Factor 2   | Factor 3      | TMP  |
|-----|-----|--------------|------------|---------------|------|
|     |     | A:DO<br>mg/L | B:HRT<br>h | C:SRT<br>days | kPa  |
| 9   | 1   | 3.5          | 18         | 10            | 9.1  |
| 7   | 2   | 1.5          | 24         | 15            | 13.4 |
| 4   | 3   | 5.5          | 24         | 5             | 10.1 |
| 8   | 4   | 5.5          | 24         | 15            | 10.7 |
| 6   | 5   | 5.5          | 12         | 15            | 9.5  |
| 2   | 6   | 5.5          | 12         | 5             | 9.3  |
| 10  | 7   | 3.5          | 18         | 10            | 8.8  |
| 1   | 8   | 1.5          | 12         | 5             | 12.8 |
| 11  | 9   | 3.5          | 18         | 10            | 8.7  |
| 5   | 10  | 1.5          | 12         | 15            | 12.6 |
| 3   | 11  | 1.5          | 24         | 5             | 12.1 |

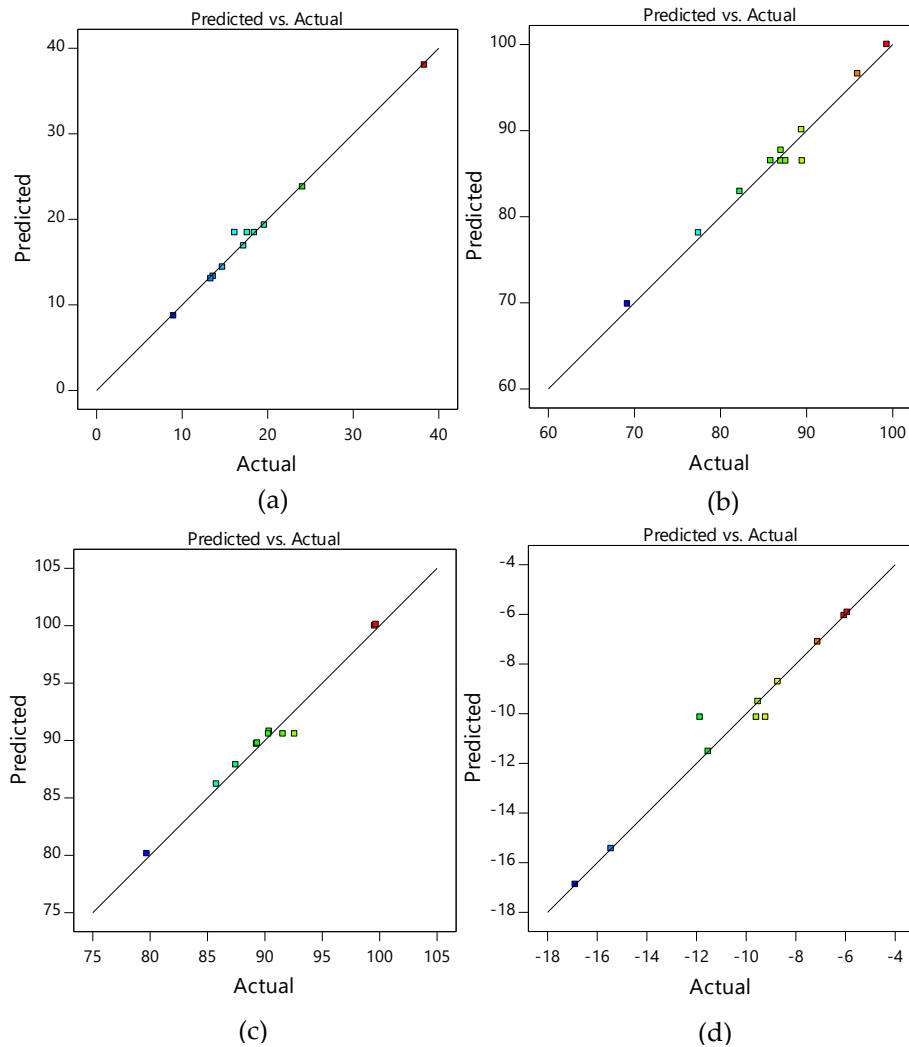

**Figure S3.** Comparison of predicted and actual values of: (a) CBZ, (b) COD, (c) ammonia, and (d) phosphorus removal efficiency.

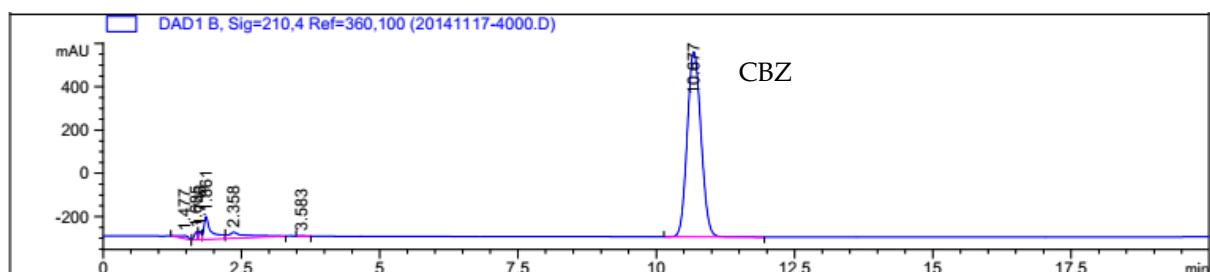

**Figure S4.** HPLC – DAD chromatogram of CBZ standard containing 100 µg/mL at 210 nm wavelength.

**Table S3.** Average influent and effluent concentrations ( $\pm$  SD) of CBZ, COD, ammonia, and phosphorus through experiments.

| Number | CBZ<br>(ug/L)     |                   | COD<br>(mg/L)      |                   | Ammonia<br>(mg/L) |                   | Phosphorus<br>(mg/L) |                   |
|--------|-------------------|-------------------|--------------------|-------------------|-------------------|-------------------|----------------------|-------------------|
|        | Influent<br>(n=3) | Effluent<br>(n=3) | Influent<br>(n=3)  | Effluent<br>(n=3) | Influent<br>(n=3) | Effluent<br>(n=3) | Influent<br>(n=3)    | Effluent<br>(n=3) |
| 1      | 67.77 $\pm$ 2.43  | 55.77 $\pm$ 2.15  | 432.89 $\pm$ 30.97 | 55.11 $\pm$ 15.75 | 58.90 $\pm$ 12.55 | 5.14 $\pm$ 3.67   | 13.64 $\pm$ 0.22     | 14.94 $\pm$ 0.14  |
|        | 91.30 $\pm$ 7.45  | 73.01 $\pm$ 1.11  | 517.78 $\pm$ 50.92 | 90.67 $\pm$ 17.64 | 59.94 $\pm$ 2.44  |                   | 14.65 $\pm$ 0.09     | 15.92 $\pm$ 0.07  |
| 2      | 83.77 $\pm$ 6.95  | 69.10 $\pm$ 2.58  | 462.89 $\pm$ 19.53 | 2.89 $\pm$ 1.92   | 69.36 $\pm$ 1.37  | 0.29 $\pm$ 0.18   | 16.14 $\pm$ 0.05     | 18.63 $\pm$ 0.09  |
|        | 82.51 $\pm$ 5.13  | 70.19 $\pm$ 0.79  | 628.89 $\pm$ 38.49 |                   | 63.53 $\pm$ 0.90  |                   | 15.24 $\pm$ 0.22     | 17.81 $\pm$ 0.04  |
| 3      | 94.12 $\pm$ 6.99  | 85.55 $\pm$ 5.40  | 437.33 $\pm$ 8.82  | 61.78 $\pm$ 10.18 | 58.23 $\pm$ 2.40  | 6.13 $\pm$ 1.89   | 15.02 $\pm$ 0.15     | 16.75 $\pm$ 0.21  |
|        | 105.20 $\pm$ 2.78 | 90.77 $\pm$ 4.45  | 374.00 $\pm$ 15.28 | 39.56 $\pm$ 6.94  | 60.82 $\pm$ 1.70  |                   | 15.09 $\pm$ 0.08     | 16.52 $\pm$ 0.35  |
| 4      | 84.70 $\pm$ 2.71  | 71.00 $\pm$ 4.66  | 491.78 $\pm$ 9.62  | 60.67 $\pm$ 14.53 | 67.86 $\pm$ 2.78  | 6.50 $\pm$ 1.35   | 15.49 $\pm$ 0.58     | 17.31 $\pm$ 0.32  |
|        | 84.81 $\pm$ 5.56  | 64.31 $\pm$ 3.45  | 573.33 $\pm$ 66.67 | 128.44 $\pm$ 6.94 | 41.98 $\pm$ 13.29 |                   | 14.87 $\pm$ 0.27     | 15.77 $\pm$ 0.21  |
| 5      | 99.22 $\pm$ 7.58  | 80.79 $\pm$ 5.83  | 474.00 $\pm$ 20.00 | 49.56 $\pm$ 1.92  | 63.78 $\pm$ 7.99  | 4.64 $\pm$ 0.67   | 14.89 $\pm$ 0.22     | 16.26 $\pm$ 0.31  |
|        | 82.12 $\pm$ 17.55 | 70.88 $\pm$ 1.99  | 494.00 $\pm$ 14.53 | 151.78 $\pm$ 8.39 | 57.53 $\pm$ 0.50  |                   | 15.25 $\pm$ 0.14     | 16.15 $\pm$ 0.05  |
| 6      | 85.75 $\pm$ 14.09 | 52.69 $\pm$ 8.07  | 451.11 $\pm$ 38.49 | 58.44 $\pm$ 6.94  | 66.03 $\pm$ 1.92  | 7.05 $\pm$ 0.73   | 13.68 $\pm$ 0.34     | 14.64 $\pm$ 0.29  |
|        |                   |                   |                    |                   |                   |                   |                      |                   |
